# Supplementary material
Source: Research Square preprint supplement (doi:10.21203/rs.3.rs-10088439/v1)
Supplement: Supplementary file 1 [file 31bdfeaae5b0c72f638601d3.docx]

A Novel Pyrazole-Based Fluorescent Probe for the Recognition of Fe (III), Fe (II), and Cu(II) Ions

Hou Wei Fu1, Qing Dian Ma1, Xin He Yu2, Li Ma1, Jian Li1, Ya Qi Jiang1, Bao Han Zhou*1, 2

1School of Material Science & Hubei University of Technology, Wuhan 430068, China

2State Key Laboratory of Green Pesticide, Central China Normal University, Wuhan 430079, China

*e-mail: [zhoubaohan@126.com](mailto:zhoubaohan@126.com)

1H NMR (600 MHz, CDCl3) δ 7.67 (m, 2H), 7.45-7.14 (m, 12H), 6.83-6.69 (m, 4H), 6.25 (s, 1H, CH isomer 1/2), 6.13 (s, 1H, CH isomer1/2), 3.82 (s, 3H), 3.61 (s, 3H), 2.01 (s, 1H), 1.80 (s, 1H), 0.98-0.95 (m, 4H), 0.81-0.79 (m, 4H). 13C NMR (151 MHz, CDCl3) δ 158.84, 158.32, 154.88, 150.27, 146.19, 142.44, 139.07, 133.68, 130.88, 128.51, 128.40, 127.95, 127.79, 126.39, 126.09, 124.18, 123.83, 120.06, 117.27, 103.06, 99.44, 54.30, 54.08, 8.15, 7.91, 7.06, 6.87.(signals for both isomers). MS: m/z: 290.100 [M+].
